# Supplementary material
Source: PubMed Central journal article supplement (PMC2216744)

**Supplementary figure 1**

**Distribution of  $\beta$ 2ARs and  $\beta$ -arrestin lysine mutants absent stimulation**

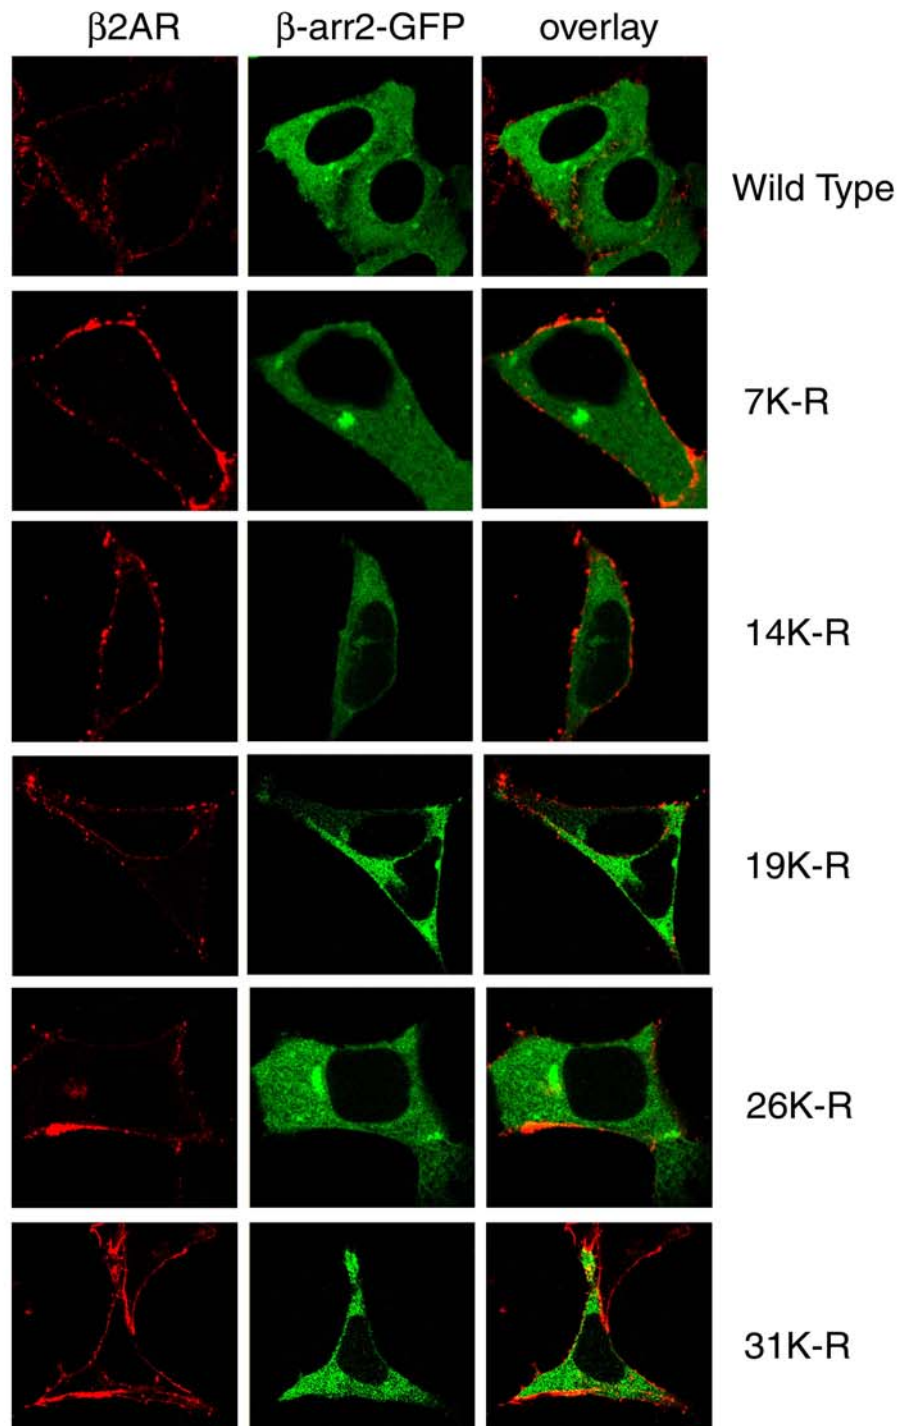

Supplement: NIHMS29410-supplement-00852-SI.pdf [file NIHMS29410-supplement-00852-SI.pdf]
